# Supplementary material
Source: Springer Nature journal article supplement (https://www.springermedizin.de/resource/supplementary/13075_2013_4081_MOESM5_ESM.pdf/9695990)

a)

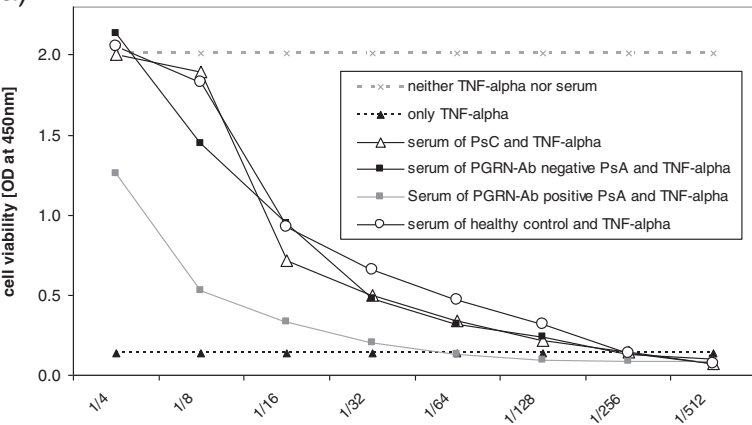

b)

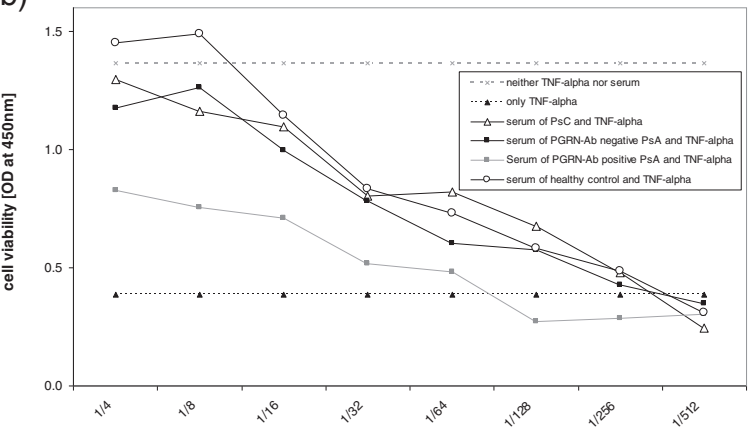

Supplement: MOESM5 [file 9695990]
